1 **Clinical, Behavioral and Social Factors Associated with Racial Disparities in Hospitalized**  
2 **and Ambulatory COVID-19 Patients from an Integrated Health Care System in Georgia**

3  
4 Felipe Lobelo, MD PhD<sup>1,2\*</sup>; Alan Bienvenida, MPH<sup>1</sup>; Serena Leung, MPH<sup>1</sup>; Armand Mbanya,  
5 MD Msc <sup>2</sup>; Elizabeth J Leslie, MA<sup>1</sup>; Kate E Koplan, MD MPH<sup>1</sup>; S. Ryan Shin, MD MA<sup>1</sup>

6  
7 <sup>1</sup>Department of Quality and Patient Safety, The Southeast Permanente Medical Group, Kaiser  
8 Permanente Georgia and <sup>2</sup>Hubert Department of Global Health, Rollins School of Public Health,  
9 Emory University, Atlanta, Georgia.

10  
11 **Please address correspondence to:**

12 Felipe Lobelo, MD PhD  
13 Physician Program Director Epidemiology, Public Health and Preparedness  
14 and Senior Physician Consultant, Population Health Research  
15 Department of Quality and Patient Safety  
16 The Southeast Permanente Medical Group; Kaiser Permanente Georgia  
17 3495 Piedmont Road NE; 9 Piedmont Center, 3rd floor  
18 Atlanta GA 30305-1736  
19 P: (470) 825-6846  
20 [Felipe.lobelo@kp.org](mailto:Felipe.lobelo@kp.org) ; [felipelobelo@emory.edu](mailto:felipelobelo@emory.edu)

21  
22  
23

24 **Abstract**

25 **Introduction:** Racial and ethnic minorities have shouldered a disproportional burden of  
26 coronavirus disease 2019 (COVID-19) infection to date in the US, but data on the various drivers  
27 of these disparities is limited.

28 **Objectives:** To describe the characteristics and outcomes of COVID-19 patients and explore  
29 factors associated with hospitalization risk by race.

30 **Methods:** Case series of 448 consecutive patients with confirmed COVID-19 seen at Kaiser  
31 Permanente Georgia (KPGA), an integrated health care system serving the Atlanta metropolitan  
32 area, from March 3 to May 12, 2020. KPGA members with laboratory-confirmed COVID-19.  
33 Multivariable analyses for hospitalization risk also included an additional 3489 persons under  
34 investigation (PUI) with suspected infection. COVID-19 treatment and outcomes, underlying  
35 comorbidities and quality of care management metrics, socio-demographic and other individual  
36 and community-level social determinants of health (SDOH) indicators.

37 **Results:** Of 448 COVID-19 positive members, 68,3% was non-Hispanic Black (n=306), 18%  
38 non-Hispanic White (n=81) and 13,7% Other race (n=61). Median age was 54 [IQR 43-63]  
39 years. Overall, 224 patients were hospitalized, median age 60 (50-69) years. Black race was a  
40 significant factor in the Confirmed + PUI, female and male models (ORs from 1.98 to 2.19).  
41 Obesity was associated with higher hospitalization odds in the confirmed, confirmed + PUI,  
42 Black and male models (ORs from 1.78 to 2.77). Chronic disease control metrics (diabetes,  
43 hypertension, hyperlipidemia) were associated with lower odds of hospitalization ranging from  
44 48% to 35% in the confirmed + PUI and Black models. Self-reported physical inactivity was  
45 associated with 50% higher hospitalization odds in the Black and Female models. Residence in

46 the Northeast region of Atlanta was associated with lower hospitalization odds in the Confirmed  
47 + PUI, White and female models (ORs from 0.22 to 0.64)

48 **Conclusions:** We found that non-Hispanic Black KPGA members had a disproportionately  
49 higher risk of infection and, after adjusting for covariates, twice the risk of hospitalization  
50 compared to other race groups. We found no significant differences in clinical outcomes or  
51 mortality across race/ethnicity groups. In addition to age, sex and comorbidity burden, pre-  
52 pandemic self-reported exercise, metrics on quality of care and control of underlying cardio-  
53 metabolic diseases, and location of residence in Atlanta were significantly associated with  
54 hospitalization risk by race groups. Beyond well-known physiologic and clinical factors,  
55 individual and community-level social indicators and health behaviors must be considered as  
56 interventions designed to reduce COVID-19 disparities and the systemic effects of racism are  
57 implemented.

58

## 59 **Manuscript Text**

### 60 **Introduction**

61 As of July 2020, despite having 4.25% of the global population, the United States (US)  
62 has contributed a quarter of the more than 10 million cases and 500,000 deaths recorded globally  
63 due to coronavirus disease 2019 (COVID-19).(1) In the US — the current epicenter of the  
64 pandemic — it has been widely reported that Black/African Americans (AA) and other  
65 racial/ethnic minorities, particularly those living in large and diverse urban centers, shoulder a  
66 disproportionate burden of COVID-19 infection risk and associated adverse health outcomes.(2-  
67 6)

68 Earlier descriptive studies from patients admitted during March/April 2020 in Georgia  
69 showed an over-representation of COVID-19 hospitalizations and death rates among the  
70 Black/AA population.(7, 8) Subsequent reports from two large health care systems in Louisiana  
71 and California, and from the Veterans Affairs health system(9) also found racial disparities in  
72 COVID-19 outcomes and clinical risk factors for hospitalization. These reports also theorized  
73 that chronic disease control, health behaviors, social and other factors may contribute to such  
74 disparities.(3, 5),(7),(8) However, limited availability of quality of care history and social  
75 determinants of health metrics in most medical health records has precluded a comprehensive,  
76 broader analyses of potential drivers of these racial disparities.

77 The U.S. Census Bureau reports the racial/ethnic demographic distribution of Georgia as  
78 58.3% White alone, 31.6% Black/AA, 9.7% Latino or Hispanic, and 4.1% Asian.(10) As of May  
79 12<sup>th</sup>, the Georgia Department of Public Health (DPH) reported confirmed COVID-19 cases by  
80 race/ethnicity as 35.1% Black/AA, 30% white, 10.1% Hispanic or Latino and 1.4% Asian(11).  
81 This overrepresentation of Black/AA and other minority populations has been observed in other  
82 Georgia counties.(11) Kaiser Permanente Georgia (KPGA) is a regional integrated health care  
83 system serving over 300,000 members in 32 counties located in the Atlanta Metropolitan Area  
84 and the Northeast region of the state. As of April 2020, KPGA membership is 43% Black/AA,  
85 30% White, 5% Asian, 4% Hispanic or Latino (18% Unknown/other), which more closely  
86 resembles metro Atlanta than overall Georgia.(12) In this study, we conducted a descriptive  
87 analysis of KPGA members with suspected and laboratory-confirmed COVID-19. KPGA's  
88 robust electronic health record (EHR) data enabled analyses throughout the continuum of care  
89 including pre-pandemic underlying disease control, COVID-19 outpatient/inpatient management  
90 and post-discharge, with a particular focus on racial/ethnic comparisons. In addition, we

91 conducted multivariable analyses for hospitalization risk based on demographics, comorbidities,  
92 quality of care metrics, lifestyle behaviors and other available individual and community-level  
93 social determinants of health indicators.

94

## 95 **Methods**

96 For this retrospective cohort study, we performed an EHR review of KPGA members  
97 seen with COVID-19 related symptoms between March 3, 2020 and May 12, 2020. Patients were  
98 screened according to the Centers for Disease Control (CDC) and Georgia DPH guidelines.(13,  
99 14) Patients who met criteria were tested for severe acute respiratory syndrome coronavirus 2  
100 (SARS-CoV-2) by polymerase chain reaction (PCR). Due to limits on the testing capacity in  
101 Georgia during this period, patients with symptoms or exposures consistent with SARS-CoV-2  
102 were categorized as having been tested or as a person under investigation (PUI). Patients who  
103 received tests were further categorized as confirmed or ruled-out. At the start of the epidemic in  
104 our region, KPGA prioritized testing among symptomatic health care workers and/or with  
105 relevant exposures and symptomatic KPGA members requiring hospital admission. After April  
106 22, testing was progressively expanded to include clinical dispositions dependent on test results  
107 (pre-operative clearance, dialysis pending, skilled nurse facility or hospice placement), high risk  
108 symptomatic patients based on clinical criteria (>65 years, immunocompromise, chronic  
109 obstructive pulmonary disease (COPD), moderate-to-severe asthma, serious heart condition,  
110 Body Mass Index (BMI)>40, diabetes, chronic kidney disease (CKD), liver disease, pregnancy)  
111 and symptomatic patients with public health implications (non-KPGA healthcare workers, first  
112 responders, jail and elder care employees, etc.)

113

114 *Patient Demographics*

115 We characterized confirmed SARS-CoV-2 and PUI patients by age, sex, self-reported  
116 race/ethnicity, insurance type, and area of residence. Race/ethnicity was categorized as non-  
117 Hispanic Black/AA (confirmed n=306; 68,3%), non-Hispanic White (n=81; 18%), and Other  
118 (n=61; 13,7%), which included Hispanic or Latino (n=16), Asian (n=15), Native American (n=1)  
119 and unknown/declined to report (n=29).

120 We obtained patient's location of residence from the EHR and categorized it into four  
121 different regions of metro Atlanta: Northeast, Northwest, Southeast, and Southwest. Residence  
122 location was also linked to the neighborhood deprivation index (NDI), a composite SDOH  
123 measure including income, education, employment and housing quality.(15, 16) The higher the  
124 NDI value, the higher the level of deprivation in the neighborhood.(15, 16) We also utilized  
125 ESRI® Business Analyst data, a comprehensive demographic and lifestyle database which  
126 provides data to help interpolate patient's socioeconomic status(17). Specifically, we linked  
127 patients' places of residency with ESRI's® zip code level classifications of median household  
128 income, occupation, and educational attainment. We used this data to cross-reference median  
129 household income with the government-defined poverty line.(18)

130

131 *Comorbidities*

132 Existing comorbidities of SARS-CoV-2 confirmed patients were obtained from the  
133 patient's EHR as classified by the International Statistical Classification of Diseases and Related  
134 Health Problems codes (ICD-10)(19). The Charlson Comorbidity Index (CCI) was used as a  
135 continuous measure of total comorbidity burden.(20) We used pharmacy dispensing data to  
136 compile the frequency of outpatient medications used by patients.

137 We used Healthcare Effectiveness Data and Information Set (HEDIS)(21) as a marker of  
138 hypertension (blood pressure reading lower than <140/90mm Hg) and diabetes control (glycated  
139 hemoglobin HbA1c < 8%) within a minimum rolling 12-month period.

140 Using KPGA's Exercise Vital Sign (EVS) data, patient's physical activity levels were  
141 classified as inactive, insufficiently active, and sufficiently active for those self-reporting ≤10  
142 minutes, 11-149 minutes, and ≥150 minutes of exercise/week, respectively. The EVS has been  
143 previously validated(22) and is considered a clinically relevant screening tool for physical  
144 activity behaviors in the health care setting(23, 24).

145

#### 146 *Clinical Outcomes*

147 Hospitalized patients with confirmed COVID-19 were characterized by hospital length of  
148 stay (LOS), ICU LOS, invasive mechanical ventilation initiation and length of use, hospital  
149 discharge, readmission, currently hospitalized (n=20; 8.9%), and deceased. Instances of  
150 admission and discharge on the same date were defined as LOS of one day. Mechanical  
151 ventilation data was compiled using an ICD-10 code flagging instances of emergency  
152 endotracheal intubation during hospital stay. Once identified, a manual chart review was  
153 conducted for each eligible patient to calculate the length of mechanical ventilation, from  
154 intubation to extubation or death. Readmissions were defined as instances of subsequent  
155 admission within 30 days to a hospital after recent discharge. We conducted manual record  
156 reviews to distinguish between encounters of readmission and patient transfers from a hospital to  
157 another medical facility.

158

159

160 *Statistical Analysis*

161 We report numbers (percentages) for binary and categorical variables and medians  
162 (interquartile ranges, IQR) for continuous variables. Chi-square tests ANOVAs and two sample  
163 t-tests were used to determine significant differences between groups. For two sample t-tests  
164 with statistically unequal variances, the Satterthwaite method was applied and reported.

165 Multivariable logistic regression was used to explore factors associated with having a  
166 COVID-19 related hospitalization in seven different models: COVID-19 confirmed cases only,  
167 confirmed cases plus PUIs, and confirmed cases plus PUIs stratified by race/ethnicity  
168 (Black/AA, White, Other) and by sex (Male and Female). All multivariable logistic regression  
169 models included age, gender and race/ethnicity as independent variables and hospitalization as  
170 the dependent variable. All additional independent variables were assessed using a bivariate  
171 analysis, either chi-squared or two sample t-test, and only the variables showing evidence of a  
172 statistically significant ( $\alpha=0.05$ ) relationship with the dependent variable were considered for  
173 entry into the models. A subset of the dependent variables was considered for the confirmed  
174 cases model due to the reduced sample size of the population. Stepwise selection method was  
175 used for final dependent variable selection with effect entry and effect remain significance levels  
176 of 0.05. All data analysis was conducted using SAS 9.4 software.

177 The KPGA institutional review board approved this study with a waiver of informed  
178 consent.

179

180

181

182



183 **Results**

184 *Epidemiologic Characteristics*

185           Within the study period we screened 6,568 patients, tested 2,920 (44.5%) and 448 (15.3%  
186 of tested) patients were positive for SARS-CoV-2. The median age of confirmed positive  
187 patients was 54 [IQR, 43-63] years old. Black/AA patients resided in neighborhoods with the  
188 highest rate under the federal poverty level (14.2%), unfavorable NDI (0.45), and the highest  
189 mean percentage of frontline (35.7%) and healthcare workers (7.5%). (Table 1). The highest  
190 percentage of the KPGA members with confirmed SARS-COV-2 resided in the Northeast Metro  
191 Atlanta area (31.5%). However, different areas of metro Atlanta showed varying prevalence of  
192 KPGA members with confirmed SARS-COV-2 when stratified by race/ethnicity. More  
193 Black/AA and Other race patients lived in the Southern areas of metro Atlanta which visible  
194 correlates with more socially deprived neighborhoods. (Figure )

195

196 *Clinical Characteristics*

197           Black/AA patients had higher rates of obesity (67.3%), hypertension (54.9%), and 2 or  
198 more comorbidities (66.3%). White patients presented with higher rates of hyperlipidemia  
199 (50.6%), congestive heart failure (CHF; 24.7%), coronary artery disease (CAD; 13.6%),  
200 arrhythmia (13.8%), CKD (11.1%) and overall CCI Scores (3.2 [2.2]) (all  $p < 0.001$ ) (Table 2).

201           Compared to other race/ethnicity groups, White patients had the highest rate of diabetes  
202 control (14.8%) but Black/AA patients had higher rates of blood pressure control (27.5%) as  
203 measured by HEDIS measures. Black/AA patients self-reported the least mean [SD] average  
204 weekly exercise minutes in all race/ethnicity groups (61.9 [88.1];  $p < 0.001$ ). The prevalence of

205 physical inactivity was higher for both Black/AA and White females compared to Other race  
206 females (38.7% vs. 41.5% vs 7.4%; all  $p < 0.001$ , respectively).

207

### 208 *Clinical Outcomes of Hospitalization*

209 Overall, 224 patients with laboratory confirmed COVID-19 were hospitalized with 248  
210 hospital stays, a median age of 60 (50-69) and a median length of stay of 6 (3-11.3) days.  
211 (Exhibit 3) There were no significant differences between Black/AA and White patients in ICU  
212 admission, ICU LOS, invasive mechanical ventilation and death (8.1% vs. 14.6%). Black/AA  
213 females were hospitalized on average 2.4 days longer than white females (95% CI 0.11 to 4.6;  $p$   
214  $\leq 0.05$ ). White females had higher 30-day readmission rates than Black/AA females (17.9% vs.  
215 4%;  $p \leq 0.05$ ). Other race females showed significantly higher rates of invasive mechanical  
216 ventilation compared to Black/AA and White females (50% vs. 17% vs 10.7%,  $p \leq 0.05$ ;  
217 respectively) (Table 3).

218

### 219 *Multivariable Analysis and Factors Associated with Hospitalization*

220 Increasing age was a significant risk factor in all models and females had lower  
221 hospitalization odds in the confirmed, confirmed + PUI, Black/AA and Other race models (ORs  
222 ranging from 0.33 to 0.51) (Table 4). Black/AA race was a significant factor in the Confirmed +  
223 PUI, female and male models (ORs ranging from 1.98 to 2.19). Obesity was associated with  
224 higher hospitalization odds in the confirmed, confirmed +PUI, Black/AA and male models (ORs  
225 ranging from 1.78 to 2.77). Every point increase in the CCI Index showed increased  
226 hospitalization odds in the White model (OR 1.35 95% CI 1.15 to 1.59;  $p < 0.001$ ) while patients  
227 with 2 or more Comorbidities had higher hospitalization odds in the Female model (OR 2.38

228 95% CI 1.43 to 3.94;  $p < 0.001$ ). Cardio-metabolic disease management and control metrics  
229 (diabetes, hypertension, hyperlipidemia) were associated with lower odds of hospitalization  
230 ranging from 48% to 35% in the confirmed + PUI and Black/AA models.

231 Self-reported physical inactivity was associated with 50% higher hospitalization odds in  
232 the Black/AA and Female models. Residence in the Northeast region of Atlanta was associated  
233 with lower hospitalization odds in the Confirmed + PUI, White and female models (ORs ranging  
234 from 0.22 to 0.64)

235

## 236 **Discussion**

237 This study shows an over-representation of Black/AA populations and other minorities in  
238 both the outpatient and inpatient phases of care for COVID-19 in an integrated care system,  
239 similar to previous reports (4, 6-9) Although a higher number of Black/AA KPGA members with  
240 COVID-19 were hospitalized (69.8%) than other races, there were no significant differences  
241 between racial/ethnic groups in ICU admission and duration, invasive ventilation and duration,  
242 30-day readmissions, and mortality. However, further stratification by sex showed Black/AA  
243 females were hospitalized on average 2.4 days longer than white females, white females had  
244 higher 30-day readmission rates than Black/AA females (17.9% vs. 4%;  $p \leq 0.05$ ) and Other race  
245 females had higher rates of invasive mechanical ventilation compared to both Black/AA and  
246 White females (50% vs. 17% vs 10.7%,  $p \leq 0.05$ ; respectively). Previous studies reported similar  
247 clinical outcomes between Black/AA and non-Black hospitalized COVID-19 patients in  
248 Georgia(7, 8) and some but not all previous report have also showed no difference in clinical  
249 outcomes between racial/ethnic groups.(9)

250 Compared to White KPGA members, a higher percentage of Black/AA members with  
251 COVID-19 were female, younger, and more likely to reside in neighborhoods with median  
252 household income less than \$75,000. Furthermore, Black/AA patients also reside at a higher  
253 proportion in neighborhoods with the highest rate of households below the federal poverty  
254 level (14.2%), positive neighborhood deprivation index (0.45), and the highest percentage of  
255 frontline (35.7%) and healthcare workers (7.5%) compared to other racial groups. All of these  
256 factors were associated with an increased risk of COVID-19 infection in our findings. In  
257 addition, Black/AA patients had the highest prevalence of obesity, hypertension, and presence of  
258 2 or more comorbidities, all associated with increased disease severity in our analysis, as was  
259 found in previous reports.(4) However, we found the comorbidity burden was somewhat  
260 different by race, with White patients in our sample being on average older and showing higher  
261 CCI scores compared to Black/AA patients, and a different mix of specific underlying conditions  
262 (hyperlipidemia, CAD, CHF, arrhythmia, CKD). Although there is a high prevalence of obesity,  
263 diabetes and other chronic diseases in the US population,(25-27) these findings suggest that a  
264 different comorbidity profile may influence COVID-19 disease severity across racial groups.

265 Similar to previous reports, our multivariable analysis revealed males were consistently  
266 more likely to be hospitalized while increasing age, obesity and hypertension were predominant  
267 factors associated with higher odds of hospitalization in all models.(7, 8) Black/AA race,  
268 diabetes, COPD, CHF, and CKD were also significant factors in different models. Of note, in the  
269 confirmed + PUIs model we detected a significant protective effect of outpatient hypertension  
270 and lipid management. Furthermore, Black/AA patients with adequate HEDIS blood pressure  
271 and diabetes control were significantly less likely to be hospitalized. Overall, these findings  
272 confirm that although the presence of various comorbidities is associated with COVID-19

273 admission, emphasis on providing adequate clinical management of baseline cardio-metabolic  
274 diseases could help ameliorate hospitalization rates. As the pandemic progresses over time,  
275 enhanced measures to ensure high quality of care for patients with multiple comorbidities should  
276 be reinforced, including those that leverage novel avenues of care including telemedicine and  
277 patient-generated actionable data, as well as sustainable linkages with community resources.(28,  
278 29)

279 Beyond demographic and underlying comorbidity burden and management, our analyses  
280 also took into account the potential role of additional SDOH, including indicators of education,  
281 economic stability, neighborhood and physical environment and lifestyle behaviors. Of these  
282 metrics, we found that residence in the Northeast area of metro Atlanta was one of the most  
283 powerful protective factors for hospitalization in the Confirmed + PUI model, particularly for  
284 White and female KPGA members. Counties in the NE region have consistently higher levels of  
285 safety, quality housing, green space, education and income and have a lower prevalence of  
286 obesity compared to the southern regions of KPGA's catchment area(30, 31).

287 Furthermore, self-reported physical inactivity — engaging in less than 10 minutes of  
288 moderate to vigorous exercise/week — increased by 50% the odds of hospitalization among  
289 Black/AA and female populations. Several biologic mechanisms may explain this novel  
290 association. Physical inactivity is a consistent risk factor for a plethora of chronic diseases shown  
291 to also increase COVID-19 severity.(32) Increased inactivity and sedentary time and related  
292 comorbidities are also associated with an increased low-grade chronic inflammatory state,(33)  
293 which may contribute to the known increased systemic inflammatory effects of SARS-COV-2.  
294 In addition to being a modulator of inflammation, regular moderate exercise is also an important  
295 immunomodulator, particularly of the virus-fighting cytotoxic immune response.(34) This is

296 reinforced by epidemiologic studies showing a link between moderate-to-vigorous regular  
297 exercise and a lower risk of upper respiratory tract viral infections – including influenza and  
298 pneumonia – as well as improved vaccine responses.(35) Although previous reports have shown  
299 that self-reported exercise is a predictor of clinical outcomes(24), it is noteworthy that physical  
300 inactivity remained a significant correlate of hospitalization risk in our study population, after  
301 adjusting for traditional “hard” risk factors such as age, BMI, comorbidity burden and  
302 therapeutic management. This reinforces the clinical value of promoting fitness and an active  
303 lifestyle, preferably outdoors, to reduce the risk of infection and disease severity of a novel  
304 infectious agent such as SARS-COV-2.(36)

305         This study has some limitations. Limited testing availability in the early stages of the  
306 pandemic — globally and in Georgia — led to prioritizing those with the most symptomatic and  
307 severe disease requiring admission, as well as testing healthcare workers to prevent further  
308 nosocomial infection. For this reason, we included in our analysis not only laboratory-confirmed  
309 but also persons under investigation seeking care with COVID-like symptoms. However, we  
310 acknowledge that not all PUIs would necessarily have SARS-COV-2. The target population in  
311 this analysis included only KPGA members that by definition have insurance and ready access to  
312 health care services. However, our analysis showed a diverse socioeconomic background of  
313 KPGA members. Merging racial/ethnic groups with low sample sizes into a combined “Other”  
314 race category was necessary for statistical power reasons but limits the interpretation of findings  
315 for this group. Finally, despite having some SDOH indicators in our member’s EHR, we also  
316 included neighborhood level data to extrapolate additional SDOH metrics. Ongoing investigation  
317 of drivers in COVID-19 disparities will benefit from more individual level SDOH data. Despite  
318 these limitations, by integrating underlying chronic disease management history, outpatient

319 information, hospitalization, clinical outcomes and post-discharge follow-up data, this study  
320 provides a comprehensive longitudinal assessment of COVID-19 patients in relation to  
321 racial/ethnic disparities.

322 To our knowledge, this investigation is the first COVID-19 retrospective cohort to  
323 include a multivariate analysis on multiple measures of SDOH and pre-pandemic comorbidity  
324 management. Our study suggests that, within our sample of KPGA members with ready access to  
325 insurance and high quality of care within an integrated health system, Black/AA members were  
326 still being disproportionately affected by COVID-19 risk of infection and hospitalization.  
327 However, we found no significant differences in clinical outcomes such as ICU length of stay or  
328 mortality across race/ethnicity groups. Location of residence, a proxy for the overall community  
329 context of our patients, appears to be a factor strongly associated with increased infection risk  
330 among Black/AA and other minorities. SDOH have also shown to contribute to a more  
331 unfavorable baseline health status and therefore, can indirectly impact COVID-19 risk of  
332 hospitalization and severity.(6) In addition to age, sex, location of residence and presence of  
333 comorbidities, pre-pandemic self-reported exercise levels and underlying cardio-metabolic  
334 disease control may also significantly impact hospitalization risk in different race groups.  
335 Therefore, beyond well-known physiologic and clinical factors, individual and community-level  
336 social factors and health behaviors must be considered by clinicians, health care systems(37) and  
337 public health stakeholders (6) as interventions designed to reduce COVID-19 disparities and the  
338 systemic effects of racism(38) are implemented.

339

340 **Acknowledgements:** Special thanks to all the clinicians, providers and staff of the Southeast  
341 Permanente Medical Group and Kaiser Permanente Georgia.

342

343

344 **References**

345

346 1. World Health Organization. Coronavirus disease (COVID-19) Situation Report – 164  
347 July 2nd 2020 [Available from: [https://www.who.int/docs/default-source/coronaviruse/situation-](https://www.who.int/docs/default-source/coronaviruse/situation-reports/20200702-covid-19-sitrep-164.pdf?sfvrsn=ac074f58_2)  
348 [reports/20200702-covid-19-sitrep-164.pdf?sfvrsn=ac074f58\\_2](https://www.who.int/docs/default-source/coronaviruse/situation-reports/20200702-covid-19-sitrep-164.pdf?sfvrsn=ac074f58_2).

349 2. Price-Haywood EG, Burton J, Fort D, Seoane L. Hospitalization and Mortality among  
350 Black Patients and White Patients with Covid-19. *N Engl J Med* 2020;382(26):2534-2543  
351 doi:101056/NEJMsa2011686. 2020.

352 3. Azar KMJ, Shen Z, Romanelli RJ, Lockhart SH, Smits K, Robinson S, et al. Disparities  
353 In Outcomes Among COVID-19 Patients In A Large Health Care System In California.  
354 [published online ahead of print, 2020 May 21]. *Health Aff (Millwood)*  
355 2020;101377hlthaff202000598 doi:101377/hlthaff202000598. 2020.

356 4. Suleyman G, Fadel RA, Malette KM, Hammond C, Abdulla H, Entz A, et al. Clinical  
357 Characteristics and Morbidity Associated With Coronavirus Disease 2019 in a Series of Patients  
358 in Metropolitan Detroit. *JAMA Netw Open*. 2020;3(6):e2012270.

359 5. Millett GA, Jones AT, Benkeser D, Baral S, Mercer L, Beyrer C, et al. Assessing  
360 Differential Impacts of COVID-19 on Black Communities [published online ahead of print, 2020  
361 May 14]. *Ann Epidemiol* 2020;101016/jannepidem202005003  
362 doi:101016/jannepidem202005003. 2020.

363 6. Centers for Disease Control and Prevention. National Center for Immunization and  
364 Respiratory Diseases (NCIRD) DoVD. COVID-19 in Racial and Ethnic Minority Groups



- 365 Atlanta, GA2020 [Available from: [https://www.cdc.gov/coronavirus/2019-ncov/need-extra-](https://www.cdc.gov/coronavirus/2019-ncov/need-extra-precautions/racial-ethnic-minorities.html)
- 366 [precautions/racial-ethnic-minorities.html](https://www.cdc.gov/coronavirus/2019-ncov/need-extra-precautions/racial-ethnic-minorities.html).
- 367 7. Gold JA WK, Szablewski CM. Characteristics and Clinical Outcomes of Adult Patients
- 368 Hospitalized with COVID-19 — Georgia, March 2020. MMWR Morb Mortal Wkly Rep 2020.
- 369 March 2020;69(18):545-50.
- 370 8. Killerby ME L-GR, Haight SC. Characteristics Associated with Hospitalization Among
- 371 Patients with COVID-19 — Metropolitan Atlanta, Georgia, March–April 2020. MMWR Morb
- 372 Mortal Wkly Rep 2020. 2020.
- 373 9. Rentsch CT, Kidwai-Khan F, Tate JP, Park LS, King Jr JT, Skanderson M, et al. Covid-
- 374 19 by Race and Ethnicity: A National Cohort Study of 6 Million United States Veterans.
- 375 Preprint. medRxiv 2020;2020051220099135 Published 2020 May 18
- 376 doi:10.1101/2020051220099135. 2020.
- 377 10. United States Census Bureau. Georgia 2020 [Available from:
- 378 <https://data.census.gov/cedsci/profile?q=Georgia&g=0400000US13&tid=ACSDP1Y2018.DP05>.
- 379 11. Georgia Department of Public Health. Georgia Department of Public Health Daily Status
- 380 Report 2020 [updated 6/6/2020. Available from: [https://dph.georgia.gov/covid-19-daily-status-](https://dph.georgia.gov/covid-19-daily-status-report)
- 381 [report](https://dph.georgia.gov/covid-19-daily-status-report).
- 382 12. Metro Atlanta Chamber. Profile of Metro Atlanta 2020 [Available from:
- 383 <https://www.metroatlantachamber.com/resources/reports-and-information/executive-profile>.

- 384 13. National Center for Immunization and Respiratory Diseases (NCIRD) Division of Viral  
385 Diseases. Standard Operating Procedure (SOP) for Triage of Suspected COVID-19 Patients in  
386 non-US Healthcare Settings: Early Identification and Prevention of Transmission during Triage:  
387 Centers for Disease Control and Prevention; 2020 [updated May 28th 2020. Available from:  
388 [https://www.cdc.gov/coronavirus/2019-ncov/hcp/non-us-settings/sop-triage-prevent-](https://www.cdc.gov/coronavirus/2019-ncov/hcp/non-us-settings/sop-triage-prevent-transmission.html)  
389 [transmission.html](https://www.cdc.gov/coronavirus/2019-ncov/hcp/non-us-settings/sop-triage-prevent-transmission.html).
- 390 14. Georgia Department of Public Health. COVID-19: Guidance for Healthcare Professionals  
391 2020 [updated April 16, 2020. Available from: [https://dph.georgia.gov/covid-19-guidance-](https://dph.georgia.gov/covid-19-guidance-healthcare-professionals)  
392 [healthcare-professionals](https://dph.georgia.gov/covid-19-guidance-healthcare-professionals).
- 393 15. Andrews MR, Tamura K, Claudel SE, Xu S, Ceasar JN, Collins BS, et al. Geospatial  
394 analysis of neighborhood deprivation index (NDI) for the United States by county. Journal of  
395 Maps. 2020;16(1):101-12.
- 396 16. Messer LC, Laraia BA, Kaufman JS, Eyster J, Holzman C, Culhane J, et al. The  
397 development of a standardized neighborhood deprivation index. J Urban Health.  
398 2006;83(6):1041-62.
- 399 17. ArcGIS. Esri Demographics - Tapestry Segmentation: ArcGIS; 2019 [updated 2019.  
400 Available from: <https://doc.arcgis.com/en/esri-demographics/data/tapestry-segmentation.htm>.
- 401 18. Office of the Assistant Secretary for Planning and Evaluation. U.S. Federal Poverty  
402 Guidelines Used to Determine Financial Eligibility for Certain Federal Programs: U.S  
403 Department of Health & Human Services; 2020 [updated January 17th 2020. Available from:  
404 <https://aspe.hhs.gov/poverty-guidelines>.

- 405 19. World Health Organization. The ICD-10 classification of mental and behavioural  
406 disorders: diagnostic criteria for research 1993.
- 407 20. Deyo RA, Cherkin DC, Ciol MA. Adapting a clinical comorbidity index for use with  
408 ICD-9-CM administrative databases. *Journal of clinical epidemiology*. 1992;45(6):613-9.
- 409 21. National Committee for Quality Assurance (NCQA). HEDIS Measures and Technical  
410 Resources 2020 [Available from: <https://www.ncqa.org/hedis/measures/>].
- 411 22. Coleman KJ, Ngor E, Reynolds K, Quinn VP, Koebnick C, Young DR, et al. Initial  
412 validation of an exercise “vital sign” in electronic medical records. *Medicine & Science in Sports  
413 & Exercise*. 2012;44(11):2071-6.
- 414 23. Young DR, Coleman KJ, Ngor E, Reynolds K, Sidell M, Sallis RE. Associations between  
415 physical activity and cardiometabolic risk factors assessed in a Southern California health care  
416 system, 2010-2012. *Preventing chronic disease*. 2014;11:E219.
- 417 24. Lobelo F, Rohm Young D, Sallis R, Garber MD, Billinger SA, Duperly J, et al. Routine  
418 Assessment and Promotion of Physical Activity in Healthcare Settings: A Scientific Statement  
419 From the American Heart Association. *Circulation*. 2018;137(18):e495-e522.
- 420 25. Hales CM, Carroll MD, Fryar CD, Ogden CL. Prevalence of obesity and severe obesity  
421 among adults: United States, 2017–2018. NCHS Data Brief, no 360 Hyattsville, MD: National  
422 Center for Health Statistics 2020. 2020.
- 423 26. Centers for Disease Control and Prevention. National Diabetes Statistics Report A, GA:  
424 Centers for Disease Control and Prevention, U.S. Dept of Health and Human Services; 2020. . . .

- 425 27. Clark A, Jit M, Warren-Gash C, Guthrie B, Wang HHX, Mercer SW, et al. Global,  
426 regional, and national estimates of the population at increased risk of severe COVID-19 due to  
427 underlying health conditions in 2020: a modelling study. *The Lancet Global health*.  
428 2020;published online ahead of print, 2020 Jun 15]. *Lancet Glob Health*. 2020;S2214-  
429 109X(20)30264-3. doi:10.1016/S2214-109X(20)30264-3.
- 430 28. Ceriello A, Schnell O. COVID-19: Considerations of Diabetes and Cardiovascular  
431 Disease Management. *Journal of diabetes science and technology*. 2020:1932296820930025.
- 432 29. Shabto JM, Loerinc L, O'Keefe GA, O'Keefe J. Characteristics and outcomes of COVID-  
433 19 positive patients with diabetes managed as outpatients. *Diabetes research and clinical*  
434 *practice*. 2020;164:108229.
- 435 30. Emory University. COVID-19 Health Equity Interactive Dashboard 2020 [Available  
436 from: <https://covid19.emory.edu/>].
- 437 31. County Health Rankings & Roadmaps. 2020 Georgia Report 2020 [Available from:  
438 <https://www.countyhealthrankings.org/reports/state-reports/2020-georgia-report>].
- 439 32. Powell KE, King AC, Buchner DM, Campbell WW, DiPietro L, Erickson KI, et al. The  
440 Scientific Foundation for the Physical Activity Guidelines for Americans, 2nd Edition. *J Phys*  
441 *Act Health*. 2018:1-11.
- 442 33. Henson J, Yates T, Edwardson CL, Khunti K, Talbot D, Gray LJ, et al. Sedentary time  
443 and markers of chronic low-grade inflammation in a high risk population. *PLoS One*.  
444 2013;8(10):e78350.

- 445 34. Nieman DC, Wentz LM. The compelling link between physical activity and the body's  
446 defense system. *Journal of sport and health science*. 2019;8(3):201-17.
- 447 35. Song Y, Ren F, Sun D, Wang M, Baker JS, Istvan B, et al. Benefits of Exercise on  
448 Influenza or Pneumonia in Older Adults: A Systematic Review. *Int J Environ Res Public Health*.  
449 2020;17(8).
- 450 36. Sallis J, Pratt M. A Call to Action: Physical Activity and COVID-19 Exercise is  
451 Medicine2020 [updated April 3, 2020. Available from:  
452 [https://www.exerciseismedicine.org/support\\_page.php/stories/?b=896](https://www.exerciseismedicine.org/support_page.php/stories/?b=896).
- 453 37. Parodi S CB, Young S, Bellows J, Grossman D, Liu VX. Kaiser Permanente's system  
454 capabilities to suppress Covid-19. *NEJM Catal* Published June 9, 2020 doi:101056/CAT200187.
- 455 38. Bryan A D-GJ, Davis NJ, Chokshi DA, Galea S. Moving From The Five Whys To Five  
456 Hows: Addressing Racial Inequities In COVID-19 Infection And Death. *Health Aff (Millwood)*  
457 2020; 101377/hblog20200625389260
- 458
- 459
- 460
- 461

**Table 1: Socio-economic and demographic characteristics of KPGA members with confirmed SARS-COV-2 seen from March 3 to May 12, 2020**

|                                                       | Patients Stratified by Race <sup>a</sup> No. (%) |                      |                  |                  |         |
|-------------------------------------------------------|--------------------------------------------------|----------------------|------------------|------------------|---------|
|                                                       | All<br>(N= 448)                                  | Black/AA<br>(n= 306) | White<br>(n= 81) | Other<br>(n= 61) | p-value |
| <b>Age, median [IQR], years</b>                       | 54 [43-63]                                       | 54 [43-62]           | 58 [49-73]       | 51 [37-61]       | <.001   |
| <b>Age range, years</b>                               |                                                  |                      |                  |                  | <.001   |
| 18-49                                                 | 169 (37.7)                                       | 116 (37.9)           | 23 (28.4)        | 30 (49.2)        |         |
| 50-64                                                 | 177 (39.5)                                       | 132 (43.1)           | 24 (29.6)        | 21 (34.4)        |         |
| 65 and above                                          | 102 (22.8)                                       | 58 (19.0)            | 34 (42.0)        | 10 (16.4)        |         |
| <b>Gender</b>                                         |                                                  |                      |                  |                  | <.001   |
| Male                                                  | 176 (39.3)                                       | 102 (33.3)           | 40 (49.4)        | 34 (55.7)        |         |
| Female                                                | 272 (60.7)                                       | 204 (66.7)           | 41 (50.6)        | 27 (44.3)        |         |
| <b>Insurance</b>                                      |                                                  |                      |                  |                  | 0.11    |
| Commercial                                            | 282 (62.9)                                       | 194 (63.4)           | 43 (53.1)        | 45 (73.8)        |         |
| Medicare                                              | 94 (21)                                          | 61 (19.9)            | 26 (32.1)        | 7 (11.5)         |         |
| Self-pay                                              | 44 (9.8)                                         | 31 (10.1)            | 7 (8.6)          | 6 (9.8)          |         |
| Other <sup>b</sup>                                    | 28 (6.3)                                         | 20 (6.6)             | 5 (6.2)          | 3 (4.9)          |         |
| <b>Median Household Income <sup>c</sup> No.</b>       | <b>439</b>                                       | <b>299</b>           | <b>80</b>        | <b>60</b>        |         |
| 25k-50k                                               | 95 (21.6)                                        | 74 (24.7)            | 9 (11.3)         | 12 (20)          | <.001   |
| 50k-75k                                               | 230 (52.4)                                       | 178 (59.5)           | 27 (33.8)        | 25 (41.7)        |         |
| 75k-100k                                              | 88 (20)                                          | 43 (14.4)            | 29 (36.3)        | 16 (26.7)        |         |
| 100k+                                                 | 26 (5.9)                                         | 4 (1.3)              | 15 (18.8)        | 7 (11.7)         |         |
| <b>Households Under Poverty Level, % <sup>d</sup></b> | 13.1                                             | 14.2                 | 10.0             | 12.0             | <.001   |
| <b>Residential Region, No. (%) <sup>e</sup></b>       | <b>308</b>                                       | <b>208</b>           | <b>51</b>        | <b>49</b>        |         |
| Northeast                                             | 97 (31.5)                                        | 55 (26.4)            | 15 (29.4)        | 27 (55.1)        | <.001   |
| Northwest                                             | 46 (14.9)                                        | 23 (11.1)            | 19 (37.3)        | 4 (8.2)          |         |
| Southeast                                             | 84 (27.3)                                        | 65 (31.3)            | 6 (11.8)         | 13 (26.5)        |         |
| Southwest                                             | 81 (26.3)                                        | 65 (31.3)            | 11 (21.6)        | 5 (10.2)         |         |
| <b>Neighborhood Deprivation Index <sup>f</sup></b>    | 0.21                                             | 0.45                 | -0.48            | -0.07            | <.001   |
| <b>Occupation <sup>g</sup>, mean % <sup>h</sup></b>   |                                                  |                      |                  |                  |         |
| Frontline Workers                                     | 34.4                                             | 35.7                 | 29.6             | 34.3             | <.001   |
| Healthcare Workers                                    | 7.3                                              | 7.5                  | 6.9              | 6.8              | <.001   |
| Other Workers                                         | 58.3                                             | 56.8                 | 63.5             | 58.9             | <.001   |
| <b>Education, mean % <sup>h</sup></b>                 |                                                  |                      |                  |                  |         |
| Some High School                                      | 6.8                                              | 7.2                  | 5.5              | 6.5              | <.001   |
| High School                                           | 22.9                                             | 24.4                 | 18.9             | 20.9             | <.001   |
| Associates Degree                                     | 8.4                                              | 8.6                  | 7.8              | 8.3              | <.001   |
| Some College                                          | 21                                               | 22                   | 18.7             | 19.3             | <.001   |
| Bachelors                                             | 21.1                                             | 19.2                 | 26.3             | 23.4             | <.001   |
| Graduate                                              | 12.4                                             | 11.4                 | 15.6             | 13.4             | <.001   |

**Abbreviations:** IQR, Interquartile Range; COVID-19, Coronavirus Disease 2019; KPGA, Kaiser Permanente Georgia; AA, African American.

464  
465  
466  
467  
468  
469  
470  
471  
472  
473  
474  
475  
476  
477  
478  
479  
480  
481  
482  
483  
484  
485  
486  
487  
488  
489  
490  
491  
492  
493  
494  
495  
496  
497  
498  
499  
500  
501  
502  
503  
504  
505  
506  
507  
508  
509

<sup>a</sup> Other is defined as all other racial/ethnic groups (Asian, Hispanic/Latino), Unknown, and those who declined to report their race.

<sup>b</sup> Other Insurances include military Health Maintenance Organization (HMO) or Preferred Provider Organization (PPO).

<sup>c</sup> Based on ESRI® Business Analyst dataset showing median household income by zip code and then linked to individual patients based on their recorded residence.<sup>19</sup>

<sup>d</sup> Poverty line was defined by the Federal poverty level <sup>18</sup>

<sup>e</sup> The Atlanta metro area was divided up by county in four sub-regions

- Northwest: Cobb, Cherokee, Paulding, Bartow, Pickens, Polk, Troup, Habersham.
- Northeast: DeKalb, Gwinnett, Forsyth, Hall, Barrow, Jackson, Butts, Gilmer, Pike, Gordon, Jasper, Monroe.
- Southwest: Fulton, Douglas, Fayette, Coweta, Carroll, Meriwether, Heard, Dawson, Madison, Lumpkin.
- Southeast: Clayton, Henry, Rockdale, Walton, Clarke, Spalding, Oconee, Muscogee, Brooks, Town.

<sup>f</sup> The Neighborhood Deprivation Index (NDI) is a composite measure of social and economic factors such as income, education, employment and housing quality that reflect neighborhood deprivation.<sup>13,14</sup> The higher the index value, the higher the level of deprivation in the neighborhood.

<sup>g</sup> Based on ESRI® Business Analyst data.<sup>16</sup> Occupation Breakdown:

- Frontline workers included community/social services, protective services, food preparation/serving related services, building/grounds cleaning/maintenance services, construction/extraction services, installation/maintenance/repair services, production services and transportation/material moving services.
- Healthcare workers included healthcare practitioners/technicians and healthcare support staff.
- Other workers included personal care/service workers, sales and sales related workers, office/administrative support workers, farming/fishing/forestry workers, management/business/financial workers, computer/mathematical service workers, architecture/engineering workers, life/physical/social science workers, community/social service workers, legal workers, education/training/library workers and arts/design/entertainment/sports/media workers.

<sup>h</sup> Based on ESRI® Business Analyst data. It is expressed in mean percentage and provides the counts of individual education attainment and occupation by category within each zip code (denominator).<sup>19</sup>

Table 2: Comorbidities, outpatient medication, history of disease control, &amp; exercise frequency of KPGA members with confirmed SARS-COV-2 by race &amp; sex

|                               | Race/Ethnicity <sup>a</sup> |                            |                     |                    |                           |                        |                       |                          |                        |                     |
|-------------------------------|-----------------------------|----------------------------|---------------------|--------------------|---------------------------|------------------------|-----------------------|--------------------------|------------------------|---------------------|
|                               | All<br>(N=448)              | Black/AA No. (%)           |                     |                    | White No. (%)             |                        |                       | Other No. (%)            |                        |                     |
|                               |                             | Total<br>(n=306)           | Male<br>(n=102)     | Female<br>(n=204)  | Total<br>(n=81)           | Male<br>(n=40)         | Female<br>(n=41)      | Total<br>(n=61)          | Male<br>(n=34)         | Female<br>(n=27)    |
| <b>Comorbidities</b>          |                             |                            |                     |                    |                           |                        |                       |                          |                        |                     |
| Hypertension                  | 226 (50.5)                  | 168 (54.9)<br>*†, *°°      | 61 (59.8)<br>*‡‡    | 107(52.5)<br>*EE   | 37(45.7)<br>*†            | 21 (52.5)              | 16 (39)               | 21 (34.4)<br>*†, *°°     | 13 (38.2)<br>*‡‡       | 8 (29.6)<br>*EE     |
| Diabetes                      | 116 (25.9)                  | 86 (28.1)<br>*°°           | 40 (39.2)<br>§, *‡‡ | 46 (22.5)<br>§     | 21(25.9)                  | 14 (35)<br>*‡‡‡‡       | 7 (17.1)              | 9 (14.8)<br>*°°          | 5 (14.7)<br>*‡‡, *‡‡‡‡ | 4 (14.8)            |
| Obesity (BMI>30)              | 273 (60.9)                  | 207 (67.3)<br>**†, *°, *°° | 70(68.6)<br>*‡‡     | 137(67.2)<br>*E    | 39(48.1)<br>**†, *°       | 21 (52.5)              | 18 (43.9)<br>*E       | 28 (45.9)<br>**†, *°°    | 15 (44.1)<br>*‡‡       | 13 (48.1)           |
| Hyperlipidemia                | 150 (33.5)                  | 95 (31)<br>**†, *°         | 41 (40.2)<br>§, *‡  | 54 (52.9)<br>§, *E | 41(50.6)<br>**†, *°, *°°° | 23 (57.5)<br>*‡, *‡‡‡‡ | 18 (43.9)<br>*E, *EEE | 14 (23)<br>**†, *°°°     | 9 (26.5)<br>*‡‡‡‡      | 5 (18.5)<br>*EEE    |
| CAD                           | 34 (7.6)                    | 19 (6.2)<br>*°             | 11 (10.8)<br>§      | 8 (3.9)<br>§, *E   | 11(13.6)<br>*°            | 6 (15)                 | 5 (12.2)<br>*E        | 4 (6.6)                  | 3 (8.8)                | 1 (3.7)             |
| CHF                           | 61 (13.6)                   | 38 (12.4)<br>*†, *°        | 17 (16.7)<br>*‡‡    | 21 (10.3)<br>*E    | 20(24.7)<br>*†, *°, *°°°  | 10 (25)                | 10 (24.4)<br>*E       | 3 (4.9)<br>*†, *°°°      | 1 (2.9)<br>*‡‡         | 2 (7.4)             |
| Asthma                        | 47 (10.5)                   | 37 (11.8)<br>*†, *°        | 10 (9.8)            | 26 (12.7)          | 2(2.5)<br>*†, *°, *°°°    | 1 (2.5)<br>*‡‡‡‡       | 1 (2.4)<br>*EEE       | 9 (14.8)<br>*†, *°°°     | 2 (5.9)<br>¶, *‡‡‡‡    | 7 (25.9)<br>¶, *EEE |
| COPD                          | 28 (6.3)                    | 13 (4.2)<br>*†, **°        | 5 (4.9)             | 8 (3.9)<br>**E     | 12(14.8)<br>*†, **°       | 2 (5)<br>#             | 10 (24.4)<br>#, **E   | 3 (4.9)<br>*†            | 1 (2.9)                | 2 (7.4)             |
| Arrhythmia                    | 29 (6.6)                    | 16 (5.3)<br>*†, *°         | 7 (6.9)<br>*‡       | 9 (4.4)            | 11(13.8)<br>*†, *°, *°°°  | 8 (20)<br>*‡, *‡‡‡‡    | 3 (7.3)               | 2 (3.4)<br>*†, *°°°      | 1 (2.9)<br>*‡‡‡‡       | 1 (3.7)             |
| ESRD <sup>b</sup>             | 1 (0.2)                     | 1 (0.3)                    | 1 (1)               | 0 (0)              | 0(0)                      | 0 (0)                  | 0 (0)                 | 0 (0)                    | 0 (0)                  | 0 (0)               |
| HIV                           | 6 (1.3)                     | 5 (1.6)                    | 4 (3.9)<br>§        | 1 (0.5)<br>§       | 1(1.2)                    | 1 (2.5)                | 0 (0)                 | 0 (0)                    | 0 (0)                  | 0 (0)               |
| Depression                    | 69 (15.4)                   | 45 (14.7)                  | 5 (4.9)<br>§        | 40 (19.6)<br>§     | 15(18.5)                  | 3 (7.5)<br>#           | 12 (29.3)<br>#        | 9 (14.8)                 | 5 (14.7)               | 4 (14.8)            |
| CKD <sup>c</sup>              | 25 (5.6)                    | 15 (4.9)<br>*†, *°         | 6 (5.9)             | 9 (4.4)<br>*E      | 9(11.1)<br>*†, *°, *°°°   | 3 (7.5)                | 6 (14.6)<br>*E        | 1 (1.6)<br>*†, *°°°      | 0 (0)                  | 1 (3.7)             |
| Cancer                        | 15 (3.4)                    | 12 (4)                     | 7 (6.9)             | 5 (2.5)            | 2(2.5)                    | 0 (0)                  | 2 (4.9)               | 1 (1.6)                  | 1 (2.9)                | 0 (0)               |
| 2+ Comorbidities <sup>d</sup> | 281 (62.7)                  | 203 (66.3)<br>*†, *°°      | 72 (70.6)<br>*‡‡    | 131(64.2)          | 50(61.7)<br>*†            | 26 (65)                | 24 (58.5)             | 28 (45.9)<br>*†, *°°     | 15 (44.1)<br>*‡‡       | 13 (48.2)           |
| 3+ Comorbidities <sup>d</sup> | 179 (40)                    | 124 (40.5)                 | 48 (47.1)           | 76 (37.3)          | 38(46.9)<br>*°°°          | 20 (50)                | 18 (43.9)             | 17 (27.9)<br>*°°°        | 11 (32.3)              | 6 (22.2)            |
| CCI, mean [SD] <sup>e</sup>   | 2.4 [1.8]                   | 2.3 [1.6]<br>**†, *°, *°°  | 2.7 [1.8]           | 2.1 [1.5]<br>*E    | 3.2[2.2]<br>*†, *°, **°°° | 3 [1.8]<br>*‡‡‡‡       | 3.4 [2.5]<br>*E, *EEE | 1.5 [1]<br>**†, *°, *°°° | 1.6 [1.0]<br>*‡‡‡‡     | 1.36 [1.1]<br>*EEE  |



**Table 2: Comorbidities, outpatient medication, history of disease control, & exercise frequency of KPGA members with confirmed SARS-COV-2 by race & sex**

|                                                           | Race/Ethnicity <sup>a</sup> |                  |                 |                   |                 |                |                  |                 |                |                  |
|-----------------------------------------------------------|-----------------------------|------------------|-----------------|-------------------|-----------------|----------------|------------------|-----------------|----------------|------------------|
|                                                           | All<br>(N=448)              | Black/AA No. (%) |                 |                   | White No. (%)   |                |                  | Other No. (%)   |                |                  |
|                                                           |                             | Total<br>(n=306) | Male<br>(n=102) | Female<br>(n=204) | Total<br>(n=81) | Male<br>(n=40) | Female<br>(n=41) | Total<br>(n=61) | Male<br>(n=34) | Female<br>(n=27) |
| <b>Outpatient Medication, No. (%)</b>                     |                             |                  |                 |                   |                 |                |                  |                 |                |                  |
| Anti-Rheumatic                                            | 2 (0.4)                     | 1 (0.3)          | 1 (1)           | 0 (0)             | 0(0)            | 0 (0)          | 0 (0)            | 1 (1.6)         | 0 (0)          | 1 (3.7)          |
|                                                           |                             |                  |                 | ***               |                 |                |                  |                 |                | ***              |
| Anti-Hypertensive                                         | 129 (28.8)                  | 91 (29.7)        | 34 (33.3)       | 57 (27.9)         | 24(29.6)        | 15 (37.5)      | 9 (22)           | 14 (23)         | 7 (20.6)       | 7 (25.9)         |
| Anti-Asthmatic                                            | 103 (23)                    | 72 (23.5)        | 27 (26.5)       | 45 (22.1)         | 17(21)          | 9 (22.5)       | 8 (19.5)         | 14 (23)         | 4 (11.8)       | 10 (37)          |
|                                                           |                             |                  |                 | ***               |                 |                | ****             |                 | †              | †, ***, ****     |
| Anti-Hyperlipidemic                                       | 125 (27.9)                  | 81 (26.5)        | 40 (39.2)       | 41 (20.1)         | 29(35.8)        | 17 (42.5)      | 12 (29.3)        | 15 (24.6)       | 9 (26.5)       | 6 (22.2)         |
| Corticosteroids                                           | 151 (33.7)                  | 112 (36.6)       | 37 (36.3)       | 75 (36.8)         | 22(27.2)        | 9 (22.5)       | 13 (31.7)        | 17 (27.9)       | 7 (20.6)       | 10 (37)          |
| Anti-malarial                                             | 6 (1.3)                     | 4 (1.3)          | 0 (0)           | 4 (2)             | 1(1.2)          | 0 (0)          | 1 (2.4)          | 1 (1.6)         | 0 (0)          | 1 (3.7)          |
| <b>HEDIS Measures <sup>f</sup></b>                        |                             |                  |                 |                   |                 |                |                  |                 |                |                  |
| Blood Pressure Control <sup>g</sup>                       | 113 (25.2)                  | 84 (27.5)        | 35 (34.3)       | 49 (24)           | 18(22.2)        | 11 (27.5)      | 7 (17.1)         | 11 (18)         | 5 (14.7)       | 6 (22.2)         |
|                                                           |                             | *                |                 |                   | *, ****         |                |                  | ****            |                |                  |
| Diabetes Control HbA1c < 8% <sup>h</sup>                  | 55 (12.3)                   | 37 (12.1)        | 14 (13.7)       | 23 (11.3)         | 12(14.8)        | 7 (17.5)       | 5 (12.2)         | 6 (9.8)         | 3 (8.8)        | 3 (11.1)         |
|                                                           |                             | *†, *            | *‡              |                   | *†, *           | *‡             |                  | *†              |                |                  |
| <b>Weekly Exercise, mean [SD], mins <sup>i</sup></b>      |                             |                  |                 |                   |                 |                |                  |                 |                |                  |
|                                                           | 70.1 [101.8]                | 61.9 [88.1]      | 86.7 [104.5]    | 49.5 [76.1]       | 75.7 [118.5]    | 76.4 [97.74]   | 75.2 [136.2]     | 108.4 [134.9]   | 98.4 [126.8]   | 123 [148.9]      |
|                                                           |                             | *†, ****         |                 | ***               | *†              |                |                  | *†, **          |                | ***              |
| <b>Exercise Vital Sign Category, No. (%) <sup>j</sup></b> |                             |                  |                 |                   |                 |                |                  |                 |                |                  |
| Inactive                                                  | 151 (33.7)                  | 106 (34.6)       | 27 (26.5)       | 79 (38.7)         | 32(39.5)        | 15 (37.5)      | 17 (41.5)        | 13 (21.3)       | 11 (32.3)      | 2 (7.4)          |
|                                                           |                             | **†, **          |                 | ***               | **†, ****       |                | ****             | **†, **, ****   |                | ***, ****        |
| Insufficiently Active                                     | 144 (32.1)                  | 103 (33.7)       | 34 (33.3)       | 69 (33.8)         | 23(28.4)        | 11 (27.5)      | 12 (29.3)        | 18 (29.5)       | 7 (20.6)       | 11 (40.8)        |
|                                                           |                             | **†              |                 |                   | **†             |                |                  | **†             |                |                  |
| Sufficiently Active                                       | 64 (14.3)                   | 37 (12.1)        | 21 (20.6)       | 16 (7.8)          | 16(19.8)        | 8 (20)         | 8 (19.5)         | 11 (18)         | 7 (20.6)       | 4 (14.8)         |
|                                                           |                             | **†              |                 | *ε                | **†             |                | *ε               | **†             |                |                  |
| No information                                            | 89 (19.9)                   | 60 (19.6)        | 20 (19.6)       | 40 (19.7)         | 10(12.3)        | 6 (15)         | 4 (9.7)          | 19 (31.2)       | 9 (26.5)       | 10 (37)          |
|                                                           |                             | **†, **          |                 | ***               | **†, ****       |                | ****             | **†, **, ****   |                | ***, ****        |

**Abbreviations:** AA, African American; HbA1c, Glycated Hemoglobin; BMI, Body Mass Index; CAD, Coronary Artery Disease; CCI, Charlson Comorbidity Index; CHF, Congestive Heart Failure; CKD, Chronic Kidney Disease; COPD, Chronic Obstructive Pulmonary Disease; ESRD, End Stage Renal Disease;

**Significance Levels \* P ≤ 0.05, \*\* P ≤ 0.001**

**Significance Tests**

† Across Race Groups

519 ° Black/AA vs. White, °° Black/AA vs. Other, °°° White vs. Other  
520 § Black/AA Male vs. Black/AA Female  
521 # White Male vs. White Female  
522 ¶ Other Male vs. Other Female  
523 ° Black/AA Female vs. White Female, °° Black/AA Female vs. Other Female, °°° White Female vs Other Female  
524 ¶ Black/AA Male vs. White Male, ¶¶ Black/AA Male vs. Other Male, ¶¶¶ White Male vs. Other Male  
525  
526 ° Other Race is defined as all other racial/ethnic groups (Asian, Hispanic/Latino), Unknown, and those who declined to report their race.  
527 ° ESRD classified based on ICD-10 in patient’s medical history.<sup>20</sup>  
528 ° CKD classified based on diagnosis reported by the ICD-10 code in patient’s medical history.<sup>20</sup>  
529 ° Comorbidities are medical diagnoses included in medical history as ICD-10 codes. These include but are not limited to those presented in the table.  
530 ° Charlson Comorbidity Index. The lowest score of 0 corresponds to a 98% estimated 10-year survival rate.<sup>21</sup>  
531 ° Healthcare Effectiveness Data and Information Set (HEDIS), is a performance improvement tool used by healthcare organizations in the United States.<sup>22</sup> For this study, this tool was used to  
532 identify the proportion of COVID-19 confirmed patients with their chronic disease successfully controlled. Of note, the total number of people with diabetes (n=116) included in this analysis is  
533 larger than the total number of diabetics reported by HEDIS measure (n=55). This discrepancy is also observed when comparing total number of people with hypertension in this analysis (n=226)  
534 with total number of hypertensive patients reported by HEDIS measure (n=116). Explanations for these differences in sample size are related to lack of continuous membership enrollment and  
535 the likelihood of no interactions with patient within the last year. These reasons could explain the lack of documentation of HEDIS disease control.  
536 ° HEDIS measure for blood pressure control (<140/90mm HG) for KPGA members with a 12-month rolling enrollment.<sup>22</sup>  
537 ° HEDIS measure for diabetes control based on a HbA1C < 8% for KPGA members with a 12-month rolling enrollment.<sup>22</sup>  
538 ° Average exercise was collected from self-reported data during a clinical encounter in the last year.  
539 ° Exercise Vital Sign is based on patient reported weekly exercise minutes. Three categories are coded: Inactive (< 10 mins/week), insufficiently active (11-149 minutes/week) and sufficiently active  
540 (150 or more mins/week)<sup>24</sup>  
541  
542  
543  
544  
545  
546  
547  
548  
549  
550  
551  
552

553 **Table 3: Clinical outcomes of hospitalized KPGA members with confirmed COVID-19 by race & age groups**

|                                                                 | Race/Ethnicity <sup>b</sup> |                   |                    |                       |                    |                     |                   |                         |                     | Age group (years)     |                         |                            |                                |
|-----------------------------------------------------------------|-----------------------------|-------------------|--------------------|-----------------------|--------------------|---------------------|-------------------|-------------------------|---------------------|-----------------------|-------------------------|----------------------------|--------------------------------|
|                                                                 | No. (%)                     |                   |                    |                       |                    |                     |                   |                         |                     |                       |                         |                            |                                |
|                                                                 | All No. (%)                 | Black/AA          |                    |                       | White              |                     |                   | Other                   |                     |                       | 18-49                   | 50-64                      | 65+                            |
|                                                                 | Total                       | Male              | Female             | Total                 | Male               | Female              | Total             | Male                    | Female              | 18-49                 | 50-64                   | 65+                        |                                |
| <b>Hospitalization Characteristics</b>                          | <b>N = 248<sup>c</sup></b>  | <b>n=173</b>      | <b>n=79</b>        | <b>n=94</b>           | <b>n=48</b>        | <b>n=20</b>         | <b>n=28</b>       | <b>n=27</b>             | <b>n=17</b>         | <b>n=10</b>           | <b>n=62</b>             | <b>n=97</b>                | <b>n=89</b>                    |
| Age of Hospitalized Patients, median (IQR) <sup>d</sup> , years | 60<br>(50.0-69.0)           | 59<br>(49.5-66.0) | 59<br>(49.5-66.0)  | 59<br>(49.5-66.0)     | 67<br>(54.0-75.5)  | 66.5<br>(52.5-74.5) | 68<br>(55.5-77.0) | 60.5<br>(39.5-65.5)     | 62<br>(37.0-66.0)   | 52<br>(41.0-60.0)     | n/a                     | n/a                        | n/a                            |
| Hospital Length of Stay, median (IQR), days                     | 6<br>(3.0-11.3)             | 6<br>(3.0-11.0)   | 7<br>(3.0-12.0)    | 6<br>(3.0-11.0)<br>*ε | 6<br>(2.8-10.3)    | 7.5<br>(3.0-14.5)   | 4<br>(2.0-8.5)    | 5<br>(2.0 - 17.0)       | 4<br>(2.0-14.0)     | 12<br>(2.0-20)        | 5<br>(3.0-8.0)<br>*¶,   | 6<br>(3.0-12.0)<br>*¶, *∅∅ | 6<br>(3.0-14.0)<br>*¶, *∅      |
| Admitted to ICU                                                 | 104 (41.9)                  | 69 (39.9)         | 33 (41.8)          | 36 (38.3)             | 19 (39.6)          | 9 (45.0)            | 10 (35.7)         | 16 (59.3)               | 9 (52.9)            | 7 (70.0)              | 20 (32.3)               | 44 (45.4)                  | 40 (44.9)                      |
| ICU Length of Stay, median (IQR), days                          | 7<br>(2.0-13.0)             | 6<br>(2.0-13.3)   | 6<br>(3.0-14.0)    | 7<br>(1.0-13.0)       | 8<br>(1.0-10.5)    | 10<br>(8.0-13.0)    | 5.5<br>(1.0-8.0)  | 9<br>(4.0-18.0)         | 8.5<br>(2.0-18.5)   | 9<br>(5.0-19.0)       | 4<br>(1.0-16.0)         | 6<br>(3.0-12.0)            | 9<br>(3.5-16.0)                |
| Invasive Mechanical Ventilation                                 | 47 (19.0)                   | 32 (18.5)         | 16 (20.3)          | 16 (17.0)             | 6 (12.5)           | 3 (15.0)            | 3 (10.7)          | 9 (33.3) <sup>***</sup> | 4 (23.5)            | 5 (50.0)<br>*εε, *εεε | 5 (8.1)                 | 20 (20.6)                  | 22 (24.7)                      |
| Ventilator duration, median (IQR), days                         | 13<br>(8.0-16.5)            | 13<br>(8.0-15.5)  | 11.5<br>(6.0-15.5) | 13<br>(9.5-16.0)      | 10.5<br>(6.0-16.0) | 13<br>(4.0-24.0)    | 8<br>(6.0-16.0)   | 11<br>(8.0-14.0)        | 12.5<br>(9.5-16.5)  | 9<br>(8.0-14.0)       | 14<br>(13.0-15.0)<br>*¶ | 10.5<br>(6.5-13.0)<br>*¶   | 15.0<br>(8.0-19.0)<br>*¶, *∅∅∅ |
| <b>Outcomes</b>                                                 |                             |                   |                    |                       |                    |                     |                   |                         |                     |                       |                         |                            |                                |
| Discharged alive                                                | 206<br>(83.0)               | 149<br>(86.1)     | 65<br>(82.3)       | 84<br>(89.4)          | 37<br>(77.1)       | 16<br>(80.0)        | 21<br>(75.0)      | 20<br>(74.1)            | 12<br>(70.6)        | 8<br>(80.0)           | 60<br>(96.8)<br>**¶     | 86<br>(88.7)<br>**¶        | 60<br>(67.4)<br>**¶            |
| Still Hospitalized                                              | 20 (8.1)                    | 10 (5.8)<br>*†    | 6 (7.6)            | 4 (4.3)               | 4 (8.3)<br>*†      | 1 (5.0)             | 3 (10.7)          | 6 (22.2)<br>*†          | 5(29.4)<br>*‡, *‡‡‡ | 1 (10.0)              | 2 (3.2)                 | 7 (7.2)                    | 11 (12.4)                      |
| 30-day Readmission Rate                                         | 13 (5.2)                    | 7 (4.0)           | 4 (5.1)            | 3 (3.2)               | 5 (10.4)           | 0 (0.0)             | 5 (17.9)<br>*ε    | 1 (3.7)                 | 1 (5.9)             | 0 (0.0)               | 2 (3.2)                 | 2 (2.1)                    | 6 (6.7)                        |
| Deceased                                                        | 22 (8.9)                    | 14 (8.1)          | 8 (10.1)           | 6 (6.4)               | 7 (14.6)           | 3 (15.0)            | 4 (14.3)          | 1 (3.7)                 | 0 (0.0)             | 1 (10.0)              | 0 (0.0)<br>**¶          | 4 (4.1)<br>**¶             | 18 (20.2)<br>**¶               |

554 **Abbreviations:** ICU, Intensive Care Unit; IQR, interquartile range; n/a = not applicable; AA, African American

555 <sup>a</sup> Significance Levels \* P ≤ 0.05, \*\* P ≤ 0.001; Significance Tests (Categorical: Chi-Squared Test of Significance, Continuous: ANOVA Test of Significance, Two-Sample T-Test of Means)

556 <sup>b</sup> Other is defined as all other racial/ethnic groups (Asian, Hispanic/Latino), Unknown, and those who declined to report their race.

557 <sup>c</sup> N=248 includes patients at level of hospital stay. Thus, participants who were readmitted, or transferred, are accounted for more than once.

558 <sup>d</sup> Median age represents all unique hospitalized patients n=224 (Black n=160, White n=40, Other n=24); <sup>e</sup> In this table, column percentages are provided for categorical variables.

559 † Across Race Groups, ° Other vs. Black, °°° White vs. Other, ¶ Across Age Groups, ∅ Age 18-49 vs. 50-64, ∅∅ Age 18-49 vs. 65+, ∅∅∅ Age 50-64 vs. 65+

560 <sup>ε</sup> Black/AA Female vs. White Female, <sup>εε</sup> Black/AA Female vs. Other Female, <sup>εεε</sup> White Female vs Other Female; ‡ Black/AA Male vs. Other Male, ‡‡‡ White Male vs. Other Male

**Table 4: Multivariable logistic regression model odds ratios for hospitalization by COVID-19 status, Rrce, and sex**

| Sample Population                                | SARS-COV-2 Status  |                   | Race/Ethnicity Groups |                   |                    | Sex Groups        |                   |
|--------------------------------------------------|--------------------|-------------------|-----------------------|-------------------|--------------------|-------------------|-------------------|
|                                                  | Confirmed          | Confirmed & PUI   | Black/AA              | White             | Other <sup>a</sup> | Female            | Male              |
| Total sample size                                | n=448              | n=3,937           | n=2,156               | n=981             | n=800              | n=2,536           | n=1,401           |
| <b>Variables, OR (95% CI)</b>                    |                    |                   |                       |                   |                    |                   |                   |
| Age                                              | 1.03**(1.02,1.05)  | 1.05**(1.04,1.06) | 1.04**(1.03,1.06)     | 1.05**(1.02,1.08) | 1.06**(1.03,1.09)  | 1.04**(1.03,1.06) | 1.06**(1.05,1.08) |
| Race: Black                                      |                    | 1.98**(1.44,2.72) | n/a <sup>b</sup>      | n/a <sup>b</sup>  | n/a <sup>b</sup>   | 2.19**(1.40,3.42) | 2.03*(1.31,3.13)  |
| Female                                           | 0.42**(0.27,0.65)  | 0.51**(0.38,0.68) | 0.52**(0.37,0.73)     |                   | 0.33*(0.14,0.77)   | n/a <sup>c</sup>  | n/a <sup>c</sup>  |
| Obesity (BMI ≥30)                                | 1.87*(1.19,2.93)   | 1.80**(1.31,2.47) | 1.78*(1.21,2.64)      |                   |                    |                   | 2.77**(1.78,4.32) |
| CCI <sup>d</sup>                                 |                    |                   |                       | 1.35**(1.15,1.59) |                    |                   |                   |
| CHF <sup>e</sup>                                 |                    | 1.83*(1.19,2.80)  | 1.99*(1.20,3.31)      |                   |                    | 2.65**(1.54,4.52) |                   |
| Hypertension <sup>e</sup>                        | 2.09*(1.33,3.29)   | 1.76*(1.21,2.55)  | 2.02*(1.26,3.21)      |                   |                    |                   |                   |
| CKD <sup>e</sup>                                 | 11.04*(1.39,87.60) |                   |                       |                   |                    |                   |                   |
| Diabetes <sup>e</sup>                            |                    | 1.76*(1.23,2.51)  | 2.00*(1.27,3.13)      |                   |                    |                   |                   |
| Physically Inactive <sup>f</sup>                 |                    |                   | 1.50*(1.05,2.13)      |                   |                    | 1.49*(1.00,2.20)  |                   |
| COPD <sup>e</sup>                                | 5.37*(1.45,19.81)  | 1.72*(1.02,2.90)  |                       |                   |                    |                   |                   |
| 2+ Comorbidities <sup>g</sup>                    |                    |                   |                       |                   |                    | 2.38**(1.43,3.94) |                   |
| Antihypertensive                                 |                    | 0.65*(0.46,0.94)  |                       |                   |                    |                   |                   |
| Antihyperlipidemic                               |                    | 0.65*(0.45,0.95)  |                       |                   |                    |                   |                   |
| HEDIS <sup>h</sup> BP Control <sup>i</sup>       |                    |                   | 0.62*(0.41,0.94)      |                   |                    |                   |                   |
| HEDIS <sup>h</sup> Diabetes Control <sup>j</sup> |                    |                   | 0.52*(0.29,0.93)      |                   |                    |                   |                   |
| NE County Residence <sup>k</sup>                 |                    | 0.64*(0.47,0.89)  |                       | 0.22*(0.07,0.66)  |                    | 0.61*(0.38,0.95)  |                   |

562 **Abbreviations:** OR, Odds Ratio; CI, Confidence Interval; PUI, Persons Under Investigation; n/a, not applicable; BMI, Body Mass Index; AA, African American; CCI, Charlson Comorbidity Index; CHF, Congestive Heart Failure; CKD, Chronic Kidney Disease; COPD, Chronic Obstructive Pulmonary Disease; HEDIS, Healthcare Effectiveness Data and Information Set; BP: blood pressure  
563  
564 Significance Levels \* P ≤ 0.05, \*\* P ≤ 0.001

565 Odds Ratios (OR) represent yes vs no for all variables except Age (per year) and Charlson Comorbidity Index (per point)

566 <sup>a</sup> Other is defined as all other racial/ethnic groups (Asian, Hispanic/Latino), Unknown, and those who declined to state race

567 <sup>b</sup> Race Black/AA is not available as independent variable for race stratified models

568 <sup>c</sup> Gender Female not available as an independent variable for the gender stratified models

569 <sup>d</sup> Charlson Comorbidity Index<sup>21</sup>

570 <sup>e</sup> CHF, Hypertension, CKD, Diabetes, and COPD classified based on ICD-10 diagnosis in member's electronic medical record<sup>20</sup>

571 <sup>f</sup> Physically Inactive defined as self-reported exercise < 10 minutes/week.<sup>24</sup>

572 <sup>g</sup> Comorbidities here are medical diagnoses included in medical history as ICD-10 codes.<sup>20</sup>

573 <sup>h</sup> HEDIS is a performance improvement tool used by healthcare organizations in the United States.<sup>22</sup> For this study, this tool was used to identify the proportion of members with their chronic conditions successfully controlled

574 <sup>i</sup> HEDIS measure for blood pressure control (<140/90mm HG) for KPGA members with a 12-month rolling enrollment.<sup>22</sup>

575 <sup>j</sup> HEDIS measure for diabetes control based on a glycated hemoglobin HbA1c < 8% for KPGA members with a 12-month rolling enrollment.<sup>22</sup>

576 <sup>k</sup> NE County Area of Residence, extracted from member's electronic medical record, includes Dekalb, Gwinnett, Forsyth, Hall, Barrow, Jackson, Butts, Gilmer, Pike, Gordon, Jasper, Monroe counties

579 **Figure 1. Heat Map of SARS-COV-2 Confirmed Positive Patients By Race/ethnicity Groups Across Metro Atlanta's KPGA Catchment Area**

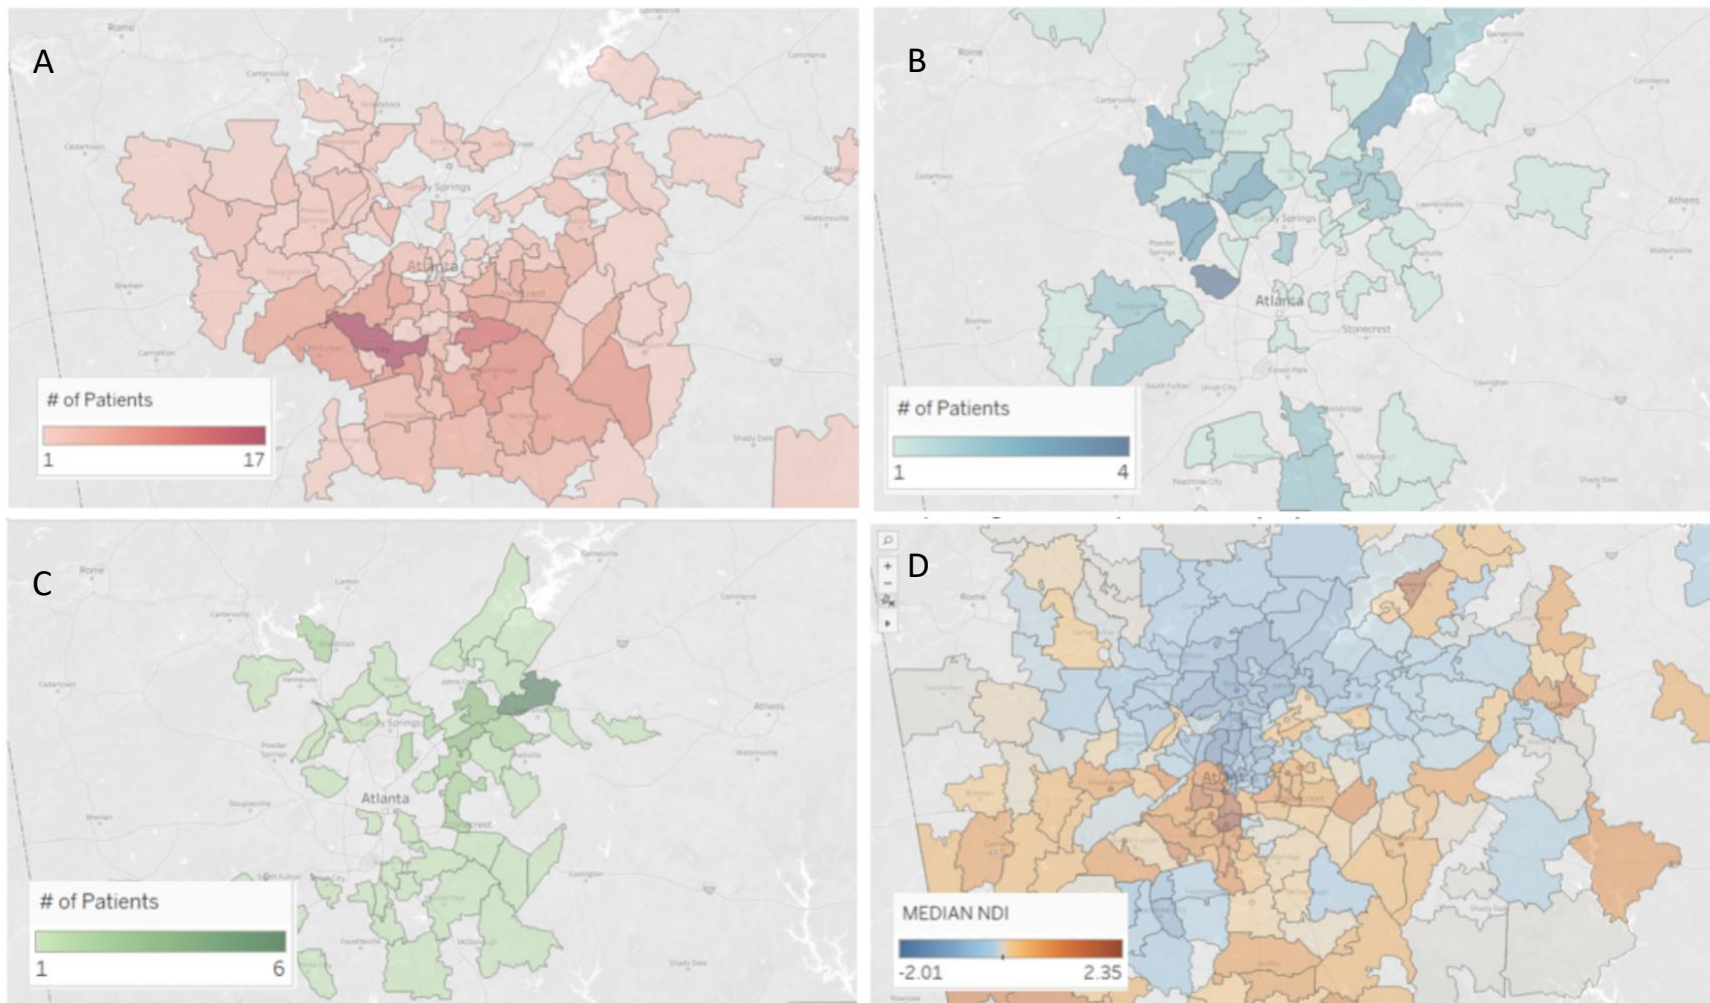

Panel A: non-Hispanic Black/African American; Panel B: non-Hispanic White; Panel C: Other race group (Hispanic/Latino, Asian, American Indian, unknown/declined to report); Panel D: Metro Atlanta Neighborhood Deprivation Index
